# Supplementary material for: Genome-Wide Identification of a Novel Eight-lncRNA Signature to Improve Prognostic Prediction in Head and Neck Squamous Cell Carcinoma
Source: Front Oncol. 2019 Sep 18;9:898. doi: 10.3389/fonc.2019.00898 (PMC6759597; doi:10.3389/fonc.2019.00898)
Supplement: Table S1 — The basic characteristics of the patients. [file Table_1.XLSX]

## Sheet: Sheet1
Table S1 The basic characteristics of the patients
Accession	Gender	Age	Smoking	Packyears	Alcohol	Tumor_type	Tumor_site	Uicc_stage	T_category	N_category	Distant_metastasis	Treatment	Hpv_dna	Hpv16_dna_rna	Os	Os_event	Pfs	Pfs_event	Consensus_cluster	Akt1_mutation	Apc_mutation	Atm_mutation	Cdh1_mutation	Cdkn2a_mutation	Csf1r_mutation	Egfr_mutation	Erbb2_mutation	Erbb4_mutation	Fbxw7_mutation	Fgfr2_mutation	Fgfr3_mutation	Flt3_mutation	Gna11_mutation	Hras_mutation	Idh1_mutation	Jak3_mutation	Kit_mutation	Notch1_mutation	Nras_mutation	Pik3ca_mutation	Pten_mutation	Rb1_mutation	Ret_mutation	Smad4_mutation	Smo_mutation	Src_mutation	Stk11_mutation	Tp53_mutation	Vhl_mutation
GSM1607684	F	59.2772	No	0	1 to 30	Primary	Oropharynx	IVA	2	2c	0	multi	HPV16	DNA+RNA+	1100	FALSE	1100	FALSE	Atypical IR 1	NA	NA	NA	NA	NA	NA	NA	NA	NA	NA	NA	NA	NA	NA	NA	NA	NA	NA	NA	NA	NA	NA	NA	NA	NA	NA	NA	NA	NA	NA
GSM1607685	M	76.2136	No	0	>60	Primary	Oropharynx	IVA	2	2b	0	mono	HPV16	DNA+RNA+	1835	FALSE	1771	TRUE	Atypical IR 1	0	0	0	0	0	0	0	0	0	0	0	0	0	0	0	0	0	0	0	0	0	0	0	0	0	0	0	0	Non-disruptive	0
GSM1607686	M	64.3915	Yes	14	31 to 60	Primary	Oropharynx	IVA	2	2c	0	mono	HPV16	NA	2393	TRUE	2393	TRUE	Atypical IR 1	0	1	0	0	0	0	0	0	0	0	0	0	0	0	0	0	0	0	0	0	0	0	0	0	0	0	0	0	Disruptive	0
GSM1607687	M	66.9322	No	0	1 to 30	Primary	Oropharynx	IVA	2	2a	0	multi	HPV16	DNA+RNA+	1212	FALSE	1212	FALSE	Atypical IR 1	0	0	0	0	0	0	0	0	0	0	0	0	0	0	0	0	0	0	0	0	0	0	0	0	0	0	0	0	WT	0
GSM1607688	F	79.0719	Yes	2	1 to 30	Primary	Oropharynx	IVB	4b	2b	0	multi	HPV16	DNA+RNA+	987	TRUE	987	TRUE	Atypical IR 1	0	0	0	0	0	0	0	0	0	0	0	0	0	0	0	0	0	0	0	0	0	0	0	0	0	0	0	0	WT	0
GSM1607689	F	46.1328	Yes	32	no	Primary	Oropharynx	IVA	2	2c	0	multi	Other HPV	NA	1939	TRUE	1939	TRUE	Basal 4	0	0	0	0	0	0	0	0	0	0	0	0	0	0	0	0	0	0	0	0	0	0	0	0	0	0	0	0	WT	0
GSM1607690	M	75.206	Yes	45	1 to 30	Primary	Oropharynx	III	2	1	0	multi	Other HPV	NA	1329	FALSE	1329	FALSE	Atypical IR 1	0	0	0	0	0	0	0	0	0	0	0	0	0	0	0	0	0	0	0	0	0	0	0	0	0	0	0	0	WT	0
GSM1607691	M	56.898	No	0	1 to 30	Primary	Oropharynx	III	2	1	0	multi	Other HPV	NA	941	FALSE	941	FALSE	Classical 2	0	0	0	0	0	0	0	0	0	0	0	0	0	0	0	0	0	0	0	0	0	0	0	0	0	0	0	0	WT	0
GSM1607692	F	69.0376	Yes	30	no	Primary	Cavum Oris	IVA	4a	2b	0	multi	Negative	DNA-	1234	FALSE	1234	FALSE	Basal 4	0	0	0	0	0	0	0	0	0	0	0	0	0	0	0	0	0	0	0	0	0	0	0	0	0	0	0	0	WT	0
GSM1607693	M	55.8932	Yes	30	>60	Primary	Cavum Oris	II	2	0	0	multi	Negative	DNA-	1024	FALSE	1024	FALSE	Mesenchymal 3	0	0	0	0	0	0	0	0	0	0	0	0	0	0	0	0	0	0	0	0	0	0	0	0	0	0	0	0	Non-disruptive	0
GSM1607694	M	50.4778	Yes	30	no	Primary	Oropharynx	II	2	0	0	multi	Negative	DNA-	884	FALSE	884	FALSE	Mesenchymal 3	NA	NA	NA	NA	NA	NA	NA	NA	NA	NA	NA	NA	NA	NA	NA	NA	NA	NA	NA	NA	NA	NA	NA	NA	NA	NA	NA	NA	NA	NA
GSM1607695	M	48.8734	Yes	40	1 to 30	Primary	Cavum Oris	II	2	0	0	multi	Negative	DNA-	1022	FALSE	1022	FALSE	Basal 4	0	0	0	0	0	0	0	0	0	0	0	0	0	0	0	0	0	0	0	0	0	0	0	0	0	0	0	0	WT	0
GSM1607696	M	58.7488	Yes	40	1 to 30	Primary	Oropharynx	IVA	4a	2c	0	multi	Negative	DNA-	1073	TRUE	1073	TRUE	Mesenchymal 3	0	0	0	0	0	0	0	0	0	0	0	0	0	0	0	0	0	0	0	0	0	0	0	0	0	0	0	0	WT	0
GSM1607697	M	64.3149	No	0	1 to 30	Primary	Cavum Oris	IVA	4a	0	0	multi	HPV16	DNA+RNA-	1289	FALSE	1289	FALSE	Atypical IR 1	0	0	0	0	0	0	1	0	0	0	0	0	0	0	0	0	0	0	0	0	1	0	0	0	0	0	0	0	WT	0
GSM1607698	F	71.5099	Yes	50	31 to 60	Primary	Cavum Oris	III	3	0	0	multi	Negative	DNA-	1066	TRUE	1066	TRUE	Mesenchymal 3	NA	NA	NA	NA	NA	NA	NA	NA	NA	NA	NA	NA	NA	NA	NA	NA	NA	NA	NA	NA	NA	NA	NA	NA	NA	NA	NA	NA	NA	NA
GSM1607699	F	63.0746	Yes	70	>60	Primary	Oropharynx	IVA	4a	1	0	multi	Negative	DNA-	1038	FALSE	1038	FALSE	Classical 2	NA	NA	NA	NA	NA	NA	NA	NA	NA	NA	NA	NA	NA	NA	NA	NA	NA	NA	NA	NA	NA	NA	NA	NA	NA	NA	NA	NA	NA	NA
GSM1607700	M	54.2669	Yes	40	>60	Primary	Oropharynx	IVA	3	2b	0	multi	Other HPV	NA	574	TRUE	472	TRUE	Mesenchymal 3	0	0	0	0	0	0	0	0	0	0	0	0	0	0	0	0	0	0	0	0	0	0	0	0	0	0	0	0	Disruptive	0
GSM1607701	M	63.8522	Yes	30	1 to 30	Primary	Oropharynx	IVC	4a	3	1	multi	HPV16	NA	2240	TRUE	2240	TRUE	Atypical IR 1	0	0	0	0	0	0	0	0	0	0	0	0	0	0	0	0	0	0	0	0	0	0	0	0	0	0	0	0	WT	0
GSM1607702	M	59.2307	Yes	20	1 to 30	Primary	Oropharynx	II	2	0	0	multi	HPV16	DNA+RNA+	1786	FALSE	1786	FALSE	Atypical IR 1	NA	NA	NA	NA	NA	NA	NA	NA	NA	NA	NA	NA	NA	NA	NA	NA	NA	NA	NA	NA	NA	NA	NA	NA	NA	NA	NA	NA	NA	NA
GSM1607703	M	68.4435	Yes	50	1 to 30	Primary	Oropharynx	IVA	2	2a	0	mono	Other HPV	NA	1822	FALSE	1822	FALSE	Basal 4	NA	NA	NA	NA	NA	NA	NA	NA	NA	NA	NA	NA	NA	NA	NA	NA	NA	NA	NA	NA	NA	NA	NA	NA	NA	NA	NA	NA	NA	NA
GSM1607704	F	69.8754	Yes	12	no	Primary	Oropharynx	IVA	3	2b	0	multi	HPV16	NA	595	TRUE	354	TRUE	Atypical IR 1	NA	NA	NA	NA	NA	NA	NA	NA	NA	NA	NA	NA	NA	NA	NA	NA	NA	NA	NA	NA	NA	NA	NA	NA	NA	NA	NA	NA	NA	NA
GSM1607705	M	53.6893	Yes	30	>60	Primary	Oropharynx	IVB	3	3	0	multi	HPV16	DNA+RNA-	1003	FALSE	1003	FALSE	Classical 2	0	0	0	0	0	0	0	0	0	0	0	0	0	0	0	0	0	0	0	0	0	0	0	0	0	0	0	0	Disruptive	0
GSM1607706	M	51.5373	Yes	10	1 to 30	Primary	Oropharynx	III	2	1	0	multi	HPV16	DNA+RNA+	1058	FALSE	1058	FALSE	Atypical IR 1	0	0	0	0	0	0	0	0	0	0	0	0	0	0	0	0	0	0	0	0	0	0	0	0	0	0	0	0	WT	0
GSM1607707	M	56.7173	Yes	40	31 to 60	Primary	Cavum Oris	IVA	4a	2b	0	multi	HPV16	DNA+RNA+	1149	FALSE	701	TRUE	Atypical IR 1	0	0	0	0	0	0	0	0	0	0	0	0	0	0	0	0	0	0	0	0	0	0	0	0	0	0	0	0	WT	0
GSM1607708	M	73.9877	No	0	1 to 30	Primary	Oropharynx	IVA	3	2b	0	multi	HPV16	DNA+RNA+	1249	FALSE	1249	FALSE	Mesenchymal 3	0	0	0	0	0	0	0	0	0	0	0	0	0	0	0	0	0	0	0	0	0	0	0	0	0	0	0	0	WT	0
GSM1607709	M	63.7262	No	0	1 to 30	Primary	Cavum Oris	IVA	4a	2b	0	multi	HPV16	DNA+RNA-	1435	FALSE	1435	FALSE	Mesenchymal 3	0	1	0	0	0	0	0	0	0	0	0	0	0	0	0	0	0	0	0	1	0	0	0	0	0	0	0	0	WT	0
GSM1607710	M	66.0835	Yes	60	31 to 60	Primary	Oropharynx	III	2	1	0	multi	HPV16	DNA+RNA+	1254	FALSE	1254	FALSE	Mesenchymal 3	0	0	0	0	1	1	0	0	0	0	0	0	0	0	0	0	0	0	0	0	0	0	1	0	0	0	0	0	WT	0
GSM1607711	F	56.5229	Yes	2	1 to 30	Primary	Oropharynx	IVA	3	2c	0	multi	HPV16	DNA+RNA+	1064	FALSE	1064	FALSE	Atypical IR 1	NA	NA	NA	NA	NA	NA	NA	NA	NA	NA	NA	NA	NA	NA	NA	NA	NA	NA	NA	NA	NA	NA	NA	NA	NA	NA	NA	NA	NA	NA
GSM1607712	M	45.796	No	0	1 to 30	Primary	Oropharynx	IVA	1	2b	0	multi	HPV16	DNA+RNA-	1724	TRUE	434	TRUE	Basal 4	0	0	0	0	0	0	0	0	0	0	0	0	0	0	0	0	0	0	0	0	0	0	0	0	0	0	0	0	Disruptive	0
GSM1607713	M	56.6543	Yes	35	>60	Primary	Oropharynx	III	1	1	0	multi	HPV16	DNA+RNA+	1687	FALSE	1343	TRUE	Atypical IR 1	0	0	0	0	0	0	0	0	0	0	0	0	0	0	0	1	0	0	0	0	0	0	0	0	0	0	0	0	WT	0
GSM1607714	M	62.5188	Yes	40	31 to 60	Primary	Cavum Oris	IVA	4a	2b	0	multi	HPV16	DNA+RNA-	473	TRUE	351	TRUE	Mesenchymal 3	0	0	0	0	0	0	0	0	0	0	0	0	0	0	0	0	0	0	0	0	0	0	0	0	0	0	0	0	WT	0
GSM1607715	M	67.6359	No	0	no	Primary	Oropharynx	IVA	4a	2c	0	multi	HPV16	DNA+RNA+	1214	TRUE	1064	TRUE	Atypical IR 1	NA	NA	NA	NA	NA	NA	NA	NA	NA	NA	NA	NA	NA	NA	NA	NA	NA	NA	NA	NA	NA	NA	NA	NA	NA	NA	NA	NA	NA	NA
GSM1607716	F	64.397	Yes	8	1 to 30	Primary	Oropharynx	IVB	4b	2c	0	multi	HPV16	DNA+RNA+	793	TRUE	793	TRUE	Atypical IR 1	NA	NA	NA	NA	NA	NA	NA	NA	NA	NA	NA	NA	NA	NA	NA	NA	NA	NA	NA	NA	NA	NA	NA	NA	NA	NA	NA	NA	NA	NA
GSM1607717	M	56.7967	Yes	60	1 to 30	Primary	Oropharynx	IVA	1	2a	0	multi	HPV16	NA	968	TRUE	968	TRUE	Basal 4	0	0	0	0	0	0	0	0	0	0	0	0	0	0	0	0	0	0	0	0	0	0	0	0	0	0	0	0	WT	0
GSM1607718	M	40.2656	Yes	NA	>60	Primary	Cavum Oris	II	2	0	0	multi	HPV16	DNA+RNA-	947	FALSE	947	FALSE	Classical 2	0	0	0	0	0	0	0	0	0	0	0	0	0	0	0	0	0	0	0	0	0	0	0	0	0	0	0	0	Disruptive	0
GSM1607719	F	52.3258	No	0	1 to 30	Primary	Oropharynx	IVA	1	2b	0	mono	HPV16	NA	933	FALSE	933	FALSE	Atypical IR 1	0	0	0	0	0	0	0	0	0	0	0	0	0	0	0	0	0	0	0	0	0	0	0	0	0	0	0	0	WT	0
GSM1607720	M	60.0301	Yes	40	31 to 60	Primary	Oropharynx	IVA	2	2c	0	multi	HPV16	NA	885	FALSE	221	TRUE	Atypical IR 1	NA	NA	NA	NA	NA	NA	NA	NA	NA	NA	NA	NA	NA	NA	NA	NA	NA	NA	NA	NA	NA	NA	NA	NA	NA	NA	NA	NA	NA	NA
GSM1607721	F	69.7577	Yes	7	no	Primary	Cavum Oris	IVB	4a	3	0	multi	HPV16	DNA+RNA+	884	FALSE	884	FALSE	Atypical IR 1	0	0	0	0	0	0	1	0	0	0	0	0	0	0	0	0	0	0	0	0	0	0	0	0	0	0	0	0	WT	0
GSM1607722	M	50.2505	Yes	111	>60	Primary	Oropharynx	IVB	4b	2c	0	multi	HPV16	DNA+RNA-	937	FALSE	937	FALSE	Mesenchymal 3	0	0	0	0	0	0	0	0	0	0	0	0	0	0	0	0	0	0	0	0	0	0	0	0	0	0	0	0	Non-disruptive	0
GSM1607723	M	52.3258	Yes	10	31 to 60	Primary	Cavum Oris	IVA	4a	2b	0	multi	Other HPV	NA	1098	TRUE	118	TRUE	Basal 4	0	0	0	0	0	0	0	0	0	0	0	0	0	0	0	0	0	0	0	0	0	0	0	0	0	0	0	0	WT	0
GSM1607724	M	71.3046	No	0	31 to 60	Primary	Oropharynx	IVA	4a	2b	0	mono	Other HPV	NA	1002	TRUE	428	TRUE	Basal 4	0	0	0	0	0	0	0	0	0	0	0	0	0	0	0	0	0	0	0	0	0	0	0	0	0	0	0	0	WT	0
GSM1607725	F	52.9227	Yes	40	>60	Primary	Oropharynx	IVA	4a	2b	0	multi	Other HPV	NA	1508	FALSE	1508	FALSE	Mesenchymal 3	NA	NA	NA	NA	NA	NA	NA	NA	NA	NA	NA	NA	NA	NA	NA	NA	NA	NA	NA	NA	NA	NA	NA	NA	NA	NA	NA	NA	NA	NA
GSM1607726	M	58.3628	Yes	40	>60	Primary	Oropharynx	IVA	3	2b	0	multi	Negative	DNA-	1191	TRUE	1191	TRUE	Atypical IR 1	0	0	0	0	0	0	0	0	0	0	0	0	0	0	0	0	0	0	0	0	0	0	0	0	0	0	0	0	WT	0
GSM1607727	M	46.5188	Yes	35	no	Primary	Oropharynx	IVA	3	2b	0	multi	Negative	DNA-	1137	FALSE	1137	FALSE	Atypical IR 1	0	0	0	0	0	0	0	0	0	0	0	0	0	0	0	0	0	0	0	0	0	0	0	0	0	0	0	0	Disruptive	0
GSM1607728	M	59.0198	Yes	60	31 to 60	Primary	Larynx	IVB	2	3	0	multi	Negative	DNA-	1281	TRUE	1281	TRUE	Basal 4	0	0	0	0	0	0	0	0	0	0	0	0	0	0	0	0	0	0	0	0	0	0	0	0	0	0	0	0	WT	0
GSM1607729	M	57.7604	Yes	50	>60	Primary	Oropharynx	IVA	4a	2c	0	mono	Negative	DNA-	753	TRUE	443	TRUE	Mesenchymal 3	0	0	0	0	0	0	0	1	0	0	0	0	0	0	0	0	0	0	0	0	0	0	0	1	0	0	0	0	WT	0
GSM1607730	M	51.4579	Yes	35	>60	Secondary	Hypopharynx	III	3	0	0	multi	Negative	DNA-	1052	FALSE	463	TRUE	Mesenchymal 3	0	0	0	0	0	0	0	0	0	0	0	0	0	0	0	0	0	0	0	0	0	0	0	0	0	0	0	0	WT	0
GSM1607731	M	47.6496	Yes	12	>60	Primary	Oropharynx	III	3	0	0	multi	Negative	DNA-	1150	TRUE	322	TRUE	Basal 4	0	0	0	0	0	0	0	0	0	0	0	0	0	0	0	0	0	0	0	0	0	0	0	0	0	0	0	0	WT	0
GSM1607732	M	48.5585	Yes	35	>60	Primary	Oropharynx	IVA	1	2a	0	multi	Negative	DNA-	1270	TRUE	1270	TRUE	Mesenchymal 3	0	0	0	0	0	0	0	0	0	0	0	0	0	0	0	0	0	0	0	0	0	0	0	0	0	0	0	0	WT	0
GSM1607733	M	68.6899	Yes	45	1 to 30	Primary	Cavum Oris	II	2	0	0	multi	Negative	DNA-	2029	FALSE	2001	TRUE	Atypical IR 1	0	0	0	0	0	0	0	0	0	0	0	0	0	0	0	0	0	0	1	0	0	0	0	1	0	0	0	1	Disruptive	0
GSM1607734	M	59.7755	Yes	48	>60	Primary	Oropharynx	IVA	4a	2b	0	multi	Negative	DNA-	267	TRUE	267	TRUE	Mesenchymal 3	NA	NA	NA	NA	NA	NA	NA	NA	NA	NA	NA	NA	NA	NA	NA	NA	NA	NA	NA	NA	NA	NA	NA	NA	NA	NA	NA	NA	NA	NA
GSM1607735	M	51.0992	Yes	30	1 to 30	Primary	Oropharynx	IVA	3	2c	0	multi	Negative	DNA-	1219	FALSE	1219	FALSE	Classical 2	0	0	0	0	0	0	0	1	0	0	0	0	0	0	0	0	0	0	0	0	0	0	0	0	0	1	0	0	Disruptive	0
GSM1607736	M	65.4182	Yes	125	31 to 60	Primary	Oropharynx	IVA	4a	0	0	mono	Negative	DNA-	1074	FALSE	143	TRUE	Basal 4	NA	NA	NA	NA	NA	NA	NA	NA	NA	NA	NA	NA	NA	NA	NA	NA	NA	NA	NA	NA	NA	NA	NA	NA	NA	NA	NA	NA	NA	NA
GSM1607737	F	78.0643	Yes	50	>60	Primary	Cavum Oris	II	2	0	0	mono	Negative	DNA-	1179	TRUE	1179	TRUE	Atypical IR 1	NA	NA	NA	NA	NA	NA	NA	NA	NA	NA	NA	NA	NA	NA	NA	NA	NA	NA	NA	NA	NA	NA	NA	NA	NA	NA	NA	NA	NA	NA
GSM1607738	F	70.4942	No	0	no	Primary	Cavum Oris	IVA	4a	0	0	multi	Negative	DNA-	1066	TRUE	304	TRUE	Basal 4	0	0	0	0	0	1	0	0	0	0	0	1	0	0	0	0	0	0	1	0	0	0	1	0	0	0	0	0	WT	0
GSM1607739	M	54.0452	Yes	30	>60	Primary	Oropharynx	III	3	1	0	multi	Negative	DNA-	1717	FALSE	1717	FALSE	Atypical IR 1	0	0	0	0	0	0	0	0	0	0	0	0	0	0	0	0	0	0	0	0	0	0	0	0	0	0	0	0	Non-disruptive	0
GSM1607740	M	43.1896	Yes	30	>60	Primary	Cavum Oris	III	2	1	0	multi	Negative	DNA-	2059	FALSE	2059	FALSE	Mesenchymal 3	0	0	0	0	0	0	0	0	0	0	0	0	0	0	0	0	0	0	0	0	0	0	0	0	0	0	0	0	Non-disruptive	0
GSM1607741	M	68.2272	No	0	31 to 60	Primary	Cavum Oris	IVA	4a	2b	0	mono	Negative	DNA-	177	TRUE	177	TRUE	Mesenchymal 3	0	0	0	0	0	0	0	0	0	0	0	0	0	0	0	0	0	0	0	0	0	0	0	0	0	0	0	0	WT	0
GSM1607742	M	69.2512	Yes	40	31 to 60	Primary	Oropharynx	IVA	3	2b	0	multi	Negative	DNA-	274	TRUE	257	TRUE	Basal 4	0	0	0	0	0	0	0	0	0	0	0	0	0	0	0	0	0	0	0	0	0	0	0	0	0	0	0	0	WT	0
GSM1607743	M	54.0096	Yes	35	31 to 60	Primary	Cavum Oris	I	1	0	0	mono	Negative	DNA-	1962	TRUE	1711	TRUE	Classical 2	0	0	0	0	0	0	0	0	0	0	0	0	0	0	0	0	0	0	0	0	0	0	0	0	0	0	0	0	Non-disruptive	0
GSM1607744	M	56.9884	Yes	41	>60	Primary	Oropharynx	II	2	0	0	multi	Negative	DNA-	2001	FALSE	2001	FALSE	Basal 4	0	0	0	0	0	0	0	0	0	0	1	1	0	0	0	0	0	0	1	0	0	0	0	0	0	0	0	1	Non-disruptive	0
GSM1607745	M	50.809	Yes	30	>60	Primary	Oropharynx	IVA	4a	2b	0	multi	Negative	DNA-	1597	FALSE	1042	TRUE	Basal 4	NA	NA	NA	NA	NA	NA	NA	NA	NA	NA	NA	NA	NA	NA	NA	NA	NA	NA	NA	NA	NA	NA	NA	NA	NA	NA	NA	NA	NA	NA
GSM1607746	M	49.0048	Yes	30	31 to 60	Primary	Cavum Oris	IVA	3	2b	0	multi	Negative	DNA-	945	FALSE	945	FALSE	Basal 4	0	0	1	0	0	0	0	0	0	0	0	0	0	0	0	0	0	0	0	0	0	0	0	0	0	0	0	0	WT	0
GSM1607747	F	69.7988	No	0	no	Primary	Cavum Oris	IVA	4a	0	0	multi	Negative	DNA-	974	FALSE	974	FALSE	Basal 4	0	0	0	0	0	0	0	0	0	0	0	0	0	0	0	0	0	0	0	0	0	0	0	0	0	0	0	0	WT	0
GSM1607748	F	59.0691	Yes	33	1 to 30	Primary	Oropharynx	IVA	1	2b	0	multi	Negative	DNA-	1002	FALSE	1002	FALSE	Atypical IR 1	0	0	0	0	0	0	0	0	0	0	0	0	0	0	0	0	0	0	0	0	0	0	0	0	0	0	0	0	WT	0
GSM1607749	F	50.6448	Yes	15	>60	Primary	Cavum Oris	IVA	2	2b	0	multi	Negative	DNA-	1016	FALSE	1016	FALSE	Mesenchymal 3	0	0	0	0	0	0	0	0	0	0	0	0	0	0	0	0	0	0	0	0	0	1	0	0	0	0	0	0	WT	0
GSM1607750	M	52.8296	Yes	36	>60	Primary	Oropharynx	IVA	4a	2a	0	multi	Negative	DNA-	1004	FALSE	1004	FALSE	Mesenchymal 3	0	0	0	0	0	0	0	0	0	0	0	0	0	0	0	0	0	0	0	0	0	0	0	0	0	0	0	0	WT	0
GSM1607751	M	87.4086	No	0	no	Primary	Cavum Oris	IVA	4a	2b	0	palliative	Negative	DNA-	1002	TRUE	1002	TRUE	Basal 4	0	0	0	0	0	0	0	0	0	0	0	0	0	1	0	0	0	0	0	0	0	0	0	0	0	0	0	0	WT	0
GSM1607752	M	56.7885	Yes	40	1 to 30	Primary	Oropharynx	IVA	4a	2b	0	multi	Negative	DNA-	982	FALSE	982	FALSE	Basal 4	0	0	0	0	0	0	0	0	0	0	0	0	0	0	0	0	0	0	0	0	0	0	0	0	0	0	0	0	Disruptive	0
GSM1607753	M	56.7693	Yes	40	>60	Primary	Cavum Oris	II	2	0	0	mono	Negative	DNA-	961	FALSE	507	TRUE	Mesenchymal 3	0	0	0	0	0	0	0	0	0	0	0	0	0	0	0	0	0	0	0	0	0	0	0	0	0	0	0	0	WT	0
GSM1607754	M	64.5339	Yes	75	31 to 60	Primary	Cavum Oris	I	1	0	0	mono	Negative	DNA-	954	FALSE	954	FALSE	Basal 4	0	0	0	0	0	0	0	0	0	0	0	0	0	0	0	0	0	0	0	0	0	0	0	0	0	0	0	0	WT	0
GSM1607755	F	52.5695	Yes	30	no	Primary	Cavum Oris	IVA	2	2b	0	multi	Negative	DNA-	951	TRUE	503	TRUE	Atypical IR 1	0	0	0	0	0	0	0	0	0	0	0	0	0	0	0	0	0	0	0	0	0	0	0	0	0	0	0	0	Non-disruptive	0
GSM1607756	M	56.8624	Yes	40	>60	Primary	Oropharynx	II	2	0	0	mono	Negative	DNA-	944	FALSE	517	TRUE	Basal 4	0	0	0	0	0	0	0	0	0	0	0	0	0	0	0	0	0	0	0	0	0	0	0	0	0	0	0	0	Non-disruptive	0
GSM1607757	M	67.3292	Yes	30	1 to 30	Primary	Cavum Oris	IVA	4a	1	0	multi	Negative	DNA-	941	FALSE	941	FALSE	Mesenchymal 3	0	0	0	0	0	0	0	0	0	0	0	0	0	0	0	0	0	0	0	0	0	0	0	0	0	0	0	0	Disruptive	0
GSM1607758	M	48.1752	Yes	35	>60	Primary	Oropharynx	IVA	3	2b	0	multi	Negative	DNA-	906	TRUE	394	TRUE	Atypical IR 1	0	0	0	0	0	0	0	0	0	0	0	0	0	0	0	0	0	0	0	0	0	0	0	0	0	0	0	0	Non-disruptive	0
GSM1607759	M	54.1328	Yes	30	>60	Primary	Cavum Oris	IVA	2	2b	0	multi	Negative	DNA-	927	FALSE	864	TRUE	Basal 4	0	0	0	0	0	0	0	0	0	0	0	0	0	0	0	0	0	0	0	0	0	0	0	0	0	0	0	0	WT	0
GSM1607760	M	61.347	No	0	>60	Primary	Oropharynx	IVB	1	3	0	multi	Negative	DNA-	896	FALSE	285	TRUE	Classical 2	0	0	0	0	0	0	0	0	0	0	0	0	0	0	0	0	0	0	0	0	0	0	0	0	0	0	0	0	WT	0
GSM1607761	M	40.0465	Yes	17	>60	Primary	Cavum Oris	IVA	2	2b	0	multi	Negative	DNA-	903	TRUE	279	TRUE	Mesenchymal 3	0	0	0	0	0	0	0	0	0	0	0	0	0	0	0	0	0	0	0	0	0	0	0	0	0	0	1	0	WT	0
GSM1607762	M	58.9268	Yes	31	1 to 30	Primary	Oropharynx	IVA	4a	2c	0	multi	Negative	DNA-	875	FALSE	875	FALSE	Basal 4	0	0	0	0	0	0	0	0	0	0	0	0	0	0	0	0	0	0	0	0	0	0	0	0	0	0	0	0	Non-disruptive	0
GSM1607763	M	77.117	Yes	45	31 to 60	Primary	Larynx	IVA	4a	2c	0	mono	Negative	DNA-	906	FALSE	906	FALSE	Mesenchymal 3	0	0	0	0	0	0	0	0	0	0	0	0	0	0	0	0	0	0	0	0	0	0	0	0	0	0	0	0	Disruptive	0
GSM1607764	M	68.3176	Yes	48	no	Primary	Hypopharynx	III	3	1	0	multi	Negative	DNA-	1808	TRUE	468	TRUE	Mesenchymal 3	NA	NA	NA	NA	NA	NA	NA	NA	NA	NA	NA	NA	NA	NA	NA	NA	NA	NA	NA	NA	NA	NA	NA	NA	NA	NA	NA	NA	NA	NA
GSM1607765	M	58.0178	Yes	15	no	Primary	Oropharynx	IVA	2	2b	0	multi	HPV16	DNA+RNA+	1837	FALSE	1837	FALSE	Atypical IR 1	0	0	0	0	0	0	0	0	0	0	0	0	0	0	0	0	0	0	0	0	0	0	0	0	0	0	0	0	WT	0
GSM1607766	M	55.707	Yes	30	>60	Primary	Oropharynx	IVA	4a	2c	0	multi	NA	NA	304	TRUE	287	TRUE	Basal 4	NA	NA	NA	NA	NA	NA	NA	NA	NA	NA	NA	NA	NA	NA	NA	NA	NA	NA	NA	NA	NA	NA	NA	NA	NA	NA	NA	NA	NA	NA
GSM1607767	M	63.5099	Yes	76	>60	Primary	Oropharynx	IVA	3	2b	0	multi	Negative	DNA-	652	TRUE	346	TRUE	Mesenchymal 3	0	0	0	0	1	0	0	0	0	0	0	0	1	0	0	0	0	0	1	0	0	0	0	0	0	0	0	0	Disruptive	0
GSM1607768	M	61.2238	Yes	40	>60	Primary	Oropharynx	IVA	4a	2b	0	multi	Negative	DNA-	2033	TRUE	228	TRUE	Atypical IR 1	0	0	0	0	0	0	0	0	0	0	0	0	0	0	0	0	0	0	1	0	0	0	0	0	0	0	0	0	Non-disruptive	0
GSM1607769	M	57.1472	Yes	60	>60	Primary	Oropharynx	III	3	0	0	multi	Negative	DNA-	1827	FALSE	1827	FALSE	Basal 4	NA	NA	NA	NA	NA	NA	NA	NA	NA	NA	NA	NA	NA	NA	NA	NA	NA	NA	NA	NA	NA	NA	NA	NA	NA	NA	NA	NA	NA	NA
GSM1607770	M	51.1923	Yes	30	>60	Primary	Oropharynx	IVA	3	2c	0	mono	Other HPV	NA	1872	TRUE	136	TRUE	Basal 4	0	0	0	0	0	0	0	0	0	0	0	0	0	0	0	0	0	0	0	0	0	0	0	0	0	0	0	0	WT	0
GSM1607771	F	70.0972	No	0	no	Primary	Oropharynx	II	2	0	0	mono	HPV16	DNA+RNA+	2025	FALSE	2025	FALSE	Atypical IR 1	NA	NA	NA	NA	NA	NA	NA	NA	NA	NA	NA	NA	NA	NA	NA	NA	NA	NA	NA	NA	NA	NA	NA	NA	NA	NA	NA	NA	NA	NA
GSM1607772	F	55.6441	Yes	10	1 to 30	Primary	Oropharynx	III	2	1	0	multi	HPV16	DNA+RNA+	1855	FALSE	1855	FALSE	Atypical IR 1	0	0	0	0	0	0	0	0	0	0	0	0	0	0	0	0	0	0	0	0	0	0	0	0	0	0	0	0	WT	0
GSM1607773	F	56.397	Yes	28	>60	Primary	Oropharynx	III	3	1	0	multi	Negative	DNA-	2310	FALSE	2310	FALSE	Basal 4	NA	NA	NA	NA	NA	NA	NA	NA	NA	NA	NA	NA	NA	NA	NA	NA	NA	NA	NA	NA	NA	NA	NA	NA	NA	NA	NA	NA	NA	NA
GSM1607774	M	69.0951	No	0	no	Secondary	Larynx	II	2	0	0	multi	Negative	DNA-	499	TRUE	499	TRUE	Classical 2	0	1	0	0	0	0	0	0	0	0	0	0	0	0	0	0	0	0	0	0	0	0	0	0	0	0	0	0	WT	0
GSM1607775	M	40.3943	Yes	7	>60	Primary	Hypopharynx	IVA	4a	2c	0	multi	Negative	DNA-	679	TRUE	569	TRUE	Classical 2	0	0	0	0	0	0	0	0	0	0	0	0	0	0	0	0	0	0	0	0	0	0	0	0	0	0	0	0	Disruptive	0
GSM1607776	M	77.41	No	0	31 to 60	Primary	Larynx	II	2	0	0	mono	Negative	DNA-	1099	FALSE	166	TRUE	Mesenchymal 3	0	0	0	0	0	0	0	0	0	0	0	0	0	0	0	0	0	0	0	0	0	0	0	0	0	0	0	0	Non-disruptive	0
GSM1607777	M	71.6687	Yes	45	31 to 60	Primary	Hypopharynx	II	2	0	0	mono	Negative	DNA-	1219	FALSE	1219	FALSE	Mesenchymal 3	0	1	0	0	0	0	0	0	0	0	0	0	0	0	0	0	0	0	0	0	0	0	0	0	0	0	0	0	WT	0
GSM1607778	M	52.4271	Yes	30	>60	Primary	Larynx	III	3	0	0	multi	Negative	DNA-	1904	FALSE	1904	FALSE	Basal 4	0	0	0	0	0	0	0	0	0	0	0	0	0	0	0	0	0	0	0	0	0	0	0	0	0	0	0	0	Non-disruptive	0
GSM1607779	M	49.2567	Yes	45	>60	Primary	Hypopharynx	IVC	4a	2c	1	multi	Negative	DNA-	23	TRUE	23	TRUE	Atypical IR 1	0	0	0	0	0	0	0	0	0	0	0	0	0	0	0	0	0	0	0	0	0	0	0	0	0	0	0	1	Disruptive	0
GSM1607780	M	44.46	Yes	30	31 to 60	Primary	Oropharynx	I	1	0	0	multi	Negative	DNA-	1176	FALSE	846	TRUE	Basal 4	0	0	0	0	0	0	0	0	0	0	0	0	0	0	0	0	0	0	0	0	0	0	0	0	0	0	0	0	Disruptive	1
GSM1607781	M	72.668	Yes	25	1 to 30	Primary	Larynx	II	2	0	0	mono	Negative	DNA-	1147	FALSE	1147	FALSE	Classical 2	0	0	0	0	0	0	0	0	0	0	0	0	0	0	0	0	0	0	0	0	0	0	0	0	0	0	0	0	WT	0
GSM1607782	F	70.4093	No	0	1 to 30	Primary	Cavum Oris	III	1	1	0	multi	Negative	DNA-	1178	FALSE	1178	FALSE	Mesenchymal 3	0	0	0	0	1	0	0	0	0	0	0	0	0	0	0	0	0	0	0	0	0	0	0	0	0	0	0	0	WT	0
GSM1607783	M	63.2005	No	0	31 to 60	Primary	Oropharynx	IVA	1	2b	0	multi	HPV16	DNA+RNA+	1123	FALSE	1123	FALSE	Atypical IR 1	0	0	0	0	0	0	0	0	0	0	0	0	0	0	0	0	0	0	0	0	0	0	0	0	0	0	0	0	WT	0
GSM1607784	M	67.4497	Yes	50	31 to 60	Primary	Larynx	IVA	4a	0	0	multi	Negative	DNA-	1051	FALSE	1051	FALSE	Classical 2	0	0	0	0	0	0	0	0	0	0	0	0	0	0	0	0	0	1	0	0	0	0	0	0	0	0	0	0	WT	0
GSM1607785	M	74.0397	Yes	30	31 to 60	Primary	Cavum Oris	IVA	4a	1	0	multi	Negative	DNA-	1184	FALSE	1184	FALSE	Basal 4	0	0	0	0	0	0	0	0	0	0	0	0	0	0	0	0	0	0	0	0	0	0	0	0	0	0	0	0	Non-disruptive	0
GSM1607786	M	60.0329	Yes	16	1 to 30	Primary	Larynx	IVA	3	2c	0	multi	Negative	DNA-	1192	FALSE	1192	FALSE	Basal 4	0	0	0	0	0	0	0	0	0	0	0	0	0	0	0	0	0	0	0	0	0	0	0	0	0	0	0	0	Non-disruptive	0
GSM1607787	M	56.9144	Yes	25	>60	Primary	Larynx	IVA	3	2c	0	multi	Negative	DNA-	1808	FALSE	1808	FALSE	Atypical IR 1	0	0	0	0	0	0	0	0	0	0	0	0	0	0	0	0	0	0	0	0	0	1	0	0	0	0	0	0	Non-disruptive	0
GSM1607788	M	69.295	Yes	30	>60	Primary	Larynx	IVA	3	2c	0	multi	Negative	DNA-	1332	FALSE	1332	FALSE	Basal 4	0	0	0	0	0	0	0	0	0	0	0	0	0	0	0	0	0	0	0	0	0	0	0	0	0	0	0	0	WT	0
GSM1607789	M	69.7248	Yes	50	1 to 30	Primary	Larynx	II	2	0	0	mono	Negative	DNA-	1305	FALSE	1305	FALSE	Mesenchymal 3	0	0	0	0	1	0	0	0	0	0	0	0	0	0	0	0	0	0	0	0	0	0	0	0	0	0	0	0	WT	0
GSM1607790	M	57.9083	Yes	40	1 to 30	Primary	Hypopharynx	IVA	3	2c	0	multi	Negative	DNA-	1024	FALSE	1024	FALSE	Mesenchymal 3	0	0	0	0	0	0	0	0	0	0	0	0	0	0	0	0	0	0	0	0	0	0	0	0	0	0	0	0	Disruptive	0
GSM1607791	M	54.1602	Yes	15	>60	Primary	Hypopharynx	III	3	1	0	multi	Negative	DNA-	1060	FALSE	1060	FALSE	Atypical IR 1	0	1	0	1	0	0	0	0	0	0	0	0	0	0	0	0	0	0	0	0	0	0	0	0	0	0	0	0	WT	0
GSM1607792	F	68.3203	No	0	1 to 30	Primary	Hypopharynx	IVA	4a	1	0	multi	Negative	DNA-	602	TRUE	602	TRUE	Basal 4	0	0	0	0	0	0	0	0	0	0	0	0	0	0	0	0	0	0	0	0	0	0	0	0	0	0	0	0	WT	0
GSM1607793	M	77.2841	Yes	80	31 to 60	Primary	Cavum Oris	II	2	0	0	multi	Negative	DNA-	831	TRUE	484	TRUE	Mesenchymal 3	0	0	0	0	0	0	0	0	0	0	0	0	0	0	0	0	0	0	0	0	0	0	0	0	0	0	0	0	Non-disruptive	0
GSM1607794	M	50.2943	Yes	30	1 to 30	Primary	Hypopharynx	III	2	1	0	multi	Negative	DNA-	1067	FALSE	1067	FALSE	Basal 4	0	1	0	0	1	0	0	0	0	0	0	0	0	0	0	0	0	0	0	0	0	0	0	0	0	0	0	0	Disruptive	0
GSM1607795	M	80.271	Yes	65	31 to 60	Primary	Larynx	I	1	0	0	mono	Negative	DNA-	118	TRUE	118	TRUE	Basal 4	0	0	0	0	0	0	0	0	0	0	0	0	0	0	0	0	0	0	0	0	0	0	0	0	0	0	0	0	WT	0
GSM1607796	F	56.5667	No	0	no	Primary	Larynx	IVA	3	2b	0	multi	HPV16	DNA+RNA-	1107	FALSE	1107	FALSE	Classical 2	0	0	0	0	0	0	0	0	1	0	0	0	0	0	0	0	0	0	0	0	0	0	0	0	0	0	0	0	WT	0
GSM1607797	M	52.334	Yes	45	31 to 60	Primary	Cavum Oris	IVA	4a	2c	0	multi	Negative	DNA-	954	FALSE	954	FALSE	Mesenchymal 3	0	0	0	0	0	0	0	0	0	0	0	0	0	0	0	0	0	0	0	0	0	0	0	0	0	0	0	0	WT	0
GSM1607798	M	68.1095	Yes	20	1 to 30	Primary	Cavum Oris	III	1	1	0	multi	Negative	DNA-	834	FALSE	834	FALSE	Basal 4	0	1	0	1	0	0	0	0	0	0	0	0	0	0	0	0	0	0	0	0	0	0	0	0	0	0	0	0	Disruptive	0
GSM1607799	M	55.3484	Yes	40	>60	Primary	Larynx	III	3	0	0	multi	Negative	DNA-	253	TRUE	253	TRUE	Basal 4	0	0	0	0	0	0	0	0	0	0	0	0	0	0	0	0	0	0	0	0	0	0	0	0	1	0	0	0	WT	0
GSM1607800	F	58.1958	Yes	30	1 to 30	Primary	Larynx	IVA	4a	2c	0	multi	HPV16	DNA+RNA+	1252	FALSE	1252	FALSE	Basal 4	0	1	0	0	0	0	0	0	0	0	0	0	0	0	0	0	0	0	0	0	0	0	0	0	0	0	0	0	WT	0
GSM1607801	M	74.8118	No	0	1 to 30	Primary	Larynx	IVC	4a	1	1	multi	Negative	DNA-	521	TRUE	457	TRUE	Mesenchymal 3	0	0	0	0	0	0	0	0	0	0	0	0	0	0	0	0	0	0	0	0	0	0	0	0	0	0	0	0	WT	0
GSM1607802	M	51.2827	Yes	35	>60	Primary	Cavum Oris	IVA	4a	2c	0	multi	Negative	DNA-	968	FALSE	968	FALSE	Mesenchymal 3	0	0	0	0	1	0	0	0	0	0	0	0	0	0	0	0	0	0	0	0	0	0	0	0	0	0	0	0	Disruptive	0
GSM1607803	M	55.1239	Yes	39	31 to 60	Primary	Larynx	IVB	3	3	0	multi	Negative	DNA-	429	TRUE	429	TRUE	Classical 2	0	0	0	0	0	0	0	0	0	0	0	0	0	0	0	0	0	0	0	0	0	0	0	0	0	0	0	0	Disruptive	0
GSM1607804	M	70.6831	Yes	20	1 to 30	Primary	Larynx	II	2	0	0	mono	Negative	DNA-	1211	FALSE	1211	FALSE	Mesenchymal 3	0	0	0	0	0	0	0	0	0	0	0	0	0	0	0	0	0	0	0	0	0	0	0	0	0	0	0	0	WT	0
GSM1607805	M	60.0684	Yes	45	>60	Primary	Larynx	I	1	0	0	mono	Negative	DNA-	1182	FALSE	67	TRUE	Classical 2	0	0	0	0	0	0	0	0	0	0	0	0	0	0	0	0	0	0	0	0	0	0	0	0	0	0	0	0	WT	0
GSM1607806	M	81.7659	No	0	1 to 30	Primary	Hypopharynx	IVA	4a	0	0	multi	Negative	DNA-	582	TRUE	561	TRUE	Atypical IR 1	0	0	0	0	0	0	0	0	0	1	0	0	0	0	0	0	0	0	0	0	0	0	0	0	0	0	0	0	Disruptive	0
GSM1607807	M	52.4052	Yes	30	>60	Primary	Hypopharynx	III	2	1	0	multi	Negative	DNA-	996	FALSE	996	FALSE	Atypical IR 1	0	0	0	0	0	0	0	0	0	0	0	0	0	0	0	0	0	0	0	0	0	0	0	0	0	0	1	0	WT	0
GSM1607808	M	61.9767	Yes	60	>60	Primary	Hypopharynx	IVA	3	2b	0	multi	Negative	DNA-	979	FALSE	979	FALSE	Mesenchymal 3	0	1	0	0	0	0	0	0	0	0	0	0	0	0	0	0	0	0	0	0	0	0	0	0	0	0	0	0	WT	0
GSM1607809	M	56.2957	Yes	70	>60	Primary	Larynx	I	1	0	0	mono	Negative	DNA-	1043	FALSE	1043	FALSE	Basal 4	0	0	0	0	0	0	0	0	0	0	0	0	0	0	0	0	0	0	0	0	0	0	0	0	0	0	0	0	WT	0
GSM1607810	M	58.6146	Yes	NA	1 to 30	Primary	Larynx	IVA	4a	2b	0	multi	Negative	DNA-	1270	TRUE	674	TRUE	Atypical IR 1	0	1	0	0	0	0	0	0	0	0	0	0	0	0	0	0	0	0	0	0	1	0	0	0	0	0	0	1	Disruptive	0
GSM1607811	M	67.0637	No	0	1 to 30	Primary	Larynx	III	3	0	0	multi	Negative	DNA-	885	FALSE	885	FALSE	Basal 4	0	0	0	0	0	0	0	0	0	0	0	0	0	0	0	0	0	0	0	0	0	0	0	0	0	0	0	0	WT	0
GSM1607812	M	57.1335	Yes	60	>60	Primary	Larynx	III	3	0	0	multi	Negative	DNA-	1185	FALSE	1185	FALSE	Classical 2	0	0	0	0	0	0	0	0	0	0	0	0	0	0	0	0	0	0	0	0	1	0	0	0	0	0	0	0	WT	0
GSM1607813	M	58.935	Yes	60	>60	Primary	Hypopharynx	IVA	4a	2c	0	multi	Negative	DNA-	811	TRUE	811	TRUE	Atypical IR 1	0	0	0	0	0	0	0	0	0	0	0	0	0	0	0	0	0	0	0	0	0	0	0	0	0	1	0	0	WT	0
GSM1607814	M	65.6454	Yes	45	31 to 60	Primary	Larynx	II	2	0	0	mono	Negative	DNA-	1024	FALSE	1024	FALSE	Mesenchymal 3	0	1	0	0	0	0	0	0	0	0	0	0	0	0	0	0	0	0	0	0	0	0	0	0	0	0	0	0	WT	0
GSM1607815	M	44.7228	Yes	50	>60	Primary	Larynx	IVA	3	2b	0	mono	Negative	DNA-	856	FALSE	733	TRUE	Basal 4	0	0	0	0	0	0	0	0	0	0	0	0	0	0	0	0	0	0	0	0	0	0	0	0	0	0	0	0	WT	0
GSM1607816	M	51.6496	Yes	33	>60	Primary	Cavum Oris	I	1	0	0	mono	Negative	DNA-	1017	FALSE	1017	FALSE	Mesenchymal 3	0	0	0	0	0	0	0	0	0	0	0	0	0	0	0	0	0	0	0	0	0	0	0	0	0	1	0	0	WT	0
GSM1607817	F	72.5202	No	0	1 to 30	Primary	Oropharynx	IVA	3	2c	0	multi	HPV16	DNA+RNA-	489	TRUE	489	TRUE	Atypical IR 1	0	1	0	0	0	0	0	0	0	0	0	0	0	0	0	0	0	0	0	0	0	0	0	0	0	0	0	0	WT	0
GSM1607818	M	64.4162	Yes	50	1 to 30	Primary	Cavum Oris	IVA	4a	2c	0	multi	Negative	DNA-	1057	FALSE	468	TRUE	Atypical IR 1	0	0	0	0	0	0	0	0	0	0	0	0	0	0	0	0	0	0	0	0	0	0	0	0	0	0	0	0	Non-disruptive	0
GSM1607819	M	55.9535	Yes	40	1 to 30	Primary	Oropharynx	IVA	4a	2c	0	mono	Other HPV	NA	1057	TRUE	188	TRUE	Mesenchymal 3	0	0	0	0	0	0	0	0	0	0	0	0	0	0	0	0	0	0	0	0	0	0	0	0	0	0	0	1	Disruptive	0
GSM1607820	M	70.7132	Yes	55	>60	Primary	Cavum Oris	II	2	0	0	multi	Negative	DNA-	1009	TRUE	1009	TRUE	Classical 2	0	0	0	0	0	0	0	0	0	0	0	0	0	0	0	0	0	0	0	0	0	0	0	0	0	0	0	0	WT	0
GSM1607821	M	53.8946	Yes	40	>60	Primary	Cavum Oris	III	3	0	0	mono	HPV16	DNA+RNA-	1107	FALSE	1008	TRUE	Basal 4	0	0	0	0	0	0	0	0	0	0	0	0	0	0	0	0	0	0	0	0	0	0	0	0	0	0	0	0	Disruptive	0
GSM1607822	M	48.8268	Yes	45	>60	Primary	Cavum Oris	II	2	0	0	mono	HPV16	DNA+RNA+	875	FALSE	875	FALSE	Mesenchymal 3	0	0	0	0	0	0	0	0	0	0	0	0	0	0	0	0	0	0	0	0	0	0	0	0	0	0	0	0	WT	0
GSM1607823	M	42.7899	No	0	1 to 30	Primary	Cavum Oris	IVA	4a	0	0	multi	Negative	DNA-	689	TRUE	622	TRUE	Basal 4	0	0	0	0	0	0	0	0	0	0	0	0	0	0	0	0	0	0	0	0	0	0	0	0	0	0	0	0	Disruptive	0
GSM1607824	M	56.9637	No	0	>60	Primary	Cavum Oris	IVC	4a	2a	1	mono	Negative	DNA-	275	TRUE	275	TRUE	Atypical IR 1	0	0	0	0	0	0	0	0	0	0	0	0	0	0	0	0	0	0	0	0	0	0	0	0	0	0	0	0	WT	0
GSM1607825	M	44.627	Yes	25	>60	Primary	Hypopharynx	IVA	3	2b	0	multi	Negative	DNA-	631	TRUE	531	TRUE	Mesenchymal 3	0	1	0	0	0	0	0	0	0	0	0	0	0	0	0	0	0	0	0	0	0	0	0	0	0	0	0	0	Disruptive	0
GSM1607826	M	66.4531	Yes	10	31 to 60	Primary	Cavum Oris	IVA	2	2b	0	multi	Negative	DNA-	1365	FALSE	1365	FALSE	Basal 4	0	1	0	0	0	0	0	0	0	0	0	0	0	0	0	0	0	0	0	0	0	0	0	0	0	0	0	0	WT	0
GSM1607827	M	56.9473	Yes	40	31 to 60	Primary	Hypopharynx	IVA	2	2b	0	multi	Negative	DNA-	815	FALSE	815	FALSE	Atypical IR 1	0	1	0	0	1	0	0	0	0	0	0	0	0	0	0	0	0	0	0	0	0	0	0	0	0	0	0	0	Disruptive	0
GSM1607828	M	68.3313	Yes	50	31 to 60	Primary	Cavum Oris	I	1	0	0	mono	Negative	DNA-	793	FALSE	793	FALSE	Mesenchymal 3	0	1	0	0	0	0	0	0	0	0	0	0	0	0	0	0	0	0	0	0	0	0	0	0	0	1	0	0	Non-disruptive	0
GSM1607829	M	77.692	No	0	31 to 60	Primary	Hypopharynx	IVA	3	2b	0	multi	Negative	DNA-	356	TRUE	356	TRUE	Mesenchymal 3	0	0	0	0	0	0	0	0	0	0	0	0	0	0	0	0	0	0	0	0	0	0	0	0	0	0	0	0	Disruptive	0
GSM1607830	M	64.5092	Yes	60	no	Primary	Larynx	IVA	4a	0	0	multi	Negative	DNA-	794	FALSE	794	FALSE	Classical 2	0	0	0	0	0	0	0	0	0	0	0	0	0	0	0	0	0	0	0	0	0	0	0	0	0	0	0	0	WT	0
GSM1607831	F	44.3066	Yes	10	1 to 30	Primary	Cavum Oris	I	1	0	0	multi	Negative	DNA-	793	FALSE	309	TRUE	Basal 4	0	0	0	0	0	0	0	0	0	0	0	0	0	0	0	0	0	0	0	0	0	0	0	0	0	0	0	0	WT	0
GSM1607832	M	70.9815	Yes	48	31 to 60	Primary	Larynx	IVA	4a	2c	0	multi	Negative	DNA-	272	TRUE	272	TRUE	Mesenchymal 3	0	0	0	0	0	0	0	0	0	0	0	0	0	0	0	0	0	0	0	0	0	0	0	0	0	0	0	0	Disruptive	0
GSM1607833	M	55.8549	Yes	30	31 to 60	Primary	Cavum Oris	IVA	4a	0	0	multi	Negative	DNA-	1025	FALSE	1025	FALSE	Basal 4	0	0	0	0	0	0	0	0	0	0	0	0	0	0	0	0	0	0	0	0	0	0	0	0	0	0	0	0	WT	0
GSM1607834	M	52.6215	Yes	35	>60	Primary	Oropharynx	III	1	1	0	mono	HPV16	DNA+RNA-	734	FALSE	434	TRUE	Atypical IR 1	NA	NA	NA	NA	NA	NA	NA	NA	NA	NA	NA	NA	NA	NA	NA	NA	NA	NA	NA	NA	NA	NA	NA	NA	NA	NA	NA	NA	NA	NA
GSM1607835	M	72.1123	Yes	15	1 to 30	Primary	Oropharynx	II	2	0	0	mono	Negative	DNA-	846	FALSE	846	FALSE	Mesenchymal 3	0	0	0	0	0	0	0	0	0	0	0	0	0	0	0	0	0	0	0	0	0	0	0	0	0	0	0	0	WT	0
GSM1607836	M	83.4825	No	0	no	Primary	Larynx	II	2	0	0	mono	Negative	DNA-	713	FALSE	713	FALSE	Basal 4	0	0	0	0	0	0	0	0	0	0	0	0	0	0	0	0	0	0	0	0	0	0	0	0	0	0	0	0	WT	0
GSM1607837	M	77.0459	Yes	60	1 to 30	Primary	Hypopharynx	III	2	1	0	mono	Negative	DNA-	1245	FALSE	1245	FALSE	Mesenchymal 3	0	0	0	0	0	0	0	0	0	0	0	0	0	0	0	0	0	0	0	0	0	0	0	0	0	0	0	0	WT	0
GSM1607838	M	54.3956	Yes	35	1 to 30	Primary	Oropharynx	IVA	4a	0	0	mono	HPV16	DNA+RNA+	725	TRUE	426	TRUE	Mesenchymal 3	0	0	0	0	0	0	0	1	0	0	0	0	0	0	0	0	0	0	0	0	0	0	0	0	0	0	0	0	WT	0
GSM1607839	F	52.6817	Yes	3	1 to 30	Primary	Larynx	IVA	4a	2b	0	multi	Negative	DNA-	755	FALSE	755	FALSE	Classical 2	0	0	0	0	1	0	0	0	0	0	0	0	0	0	0	0	0	0	0	0	0	0	0	0	0	0	0	0	Disruptive	0
GSM1607840	M	45.7604	Yes	33	31 to 60	Primary	Cavum Oris	I	1	0	0	mono	Negative	DNA-	758	FALSE	196	TRUE	Basal 4	0	0	0	0	0	0	0	0	0	0	0	0	0	0	0	0	0	0	0	0	0	0	0	0	0	0	0	0	WT	0
GSM1607841	M	72.742	Yes	45	31 to 60	Primary	Larynx	III	3	0	0	multi	Negative	DNA-	417	TRUE	353	TRUE	Mesenchymal 3	0	0	0	0	0	0	0	0	0	0	0	0	0	0	0	0	0	0	0	0	0	0	0	0	0	0	0	0	Disruptive	0
GSM1607842	F	50.2642	No	0	no	Primary	NA	III	3	1	0	multi	Negative	DNA-	1291	FALSE	1291	FALSE	Basal 4	0	0	0	0	0	0	0	0	0	0	0	0	0	0	0	0	0	0	0	0	0	0	0	0	0	0	0	0	WT	0
GSM1607843	M	73.0322	Yes	20	1 to 30	Primary	Hypopharynx	IVA	4a	1	0	mono	Negative	DNA-	269	TRUE	269	TRUE	Atypical IR 1	0	0	0	0	0	0	0	0	0	0	0	0	0	0	0	0	0	0	0	0	0	0	0	0	0	0	0	0	WT	0
GSM1607844	M	61.6454	Yes	40	1 to 30	Primary	Larynx	IVA	2	2b	0	multi	Negative	DNA-	730	FALSE	730	FALSE	Atypical IR 1	0	0	0	0	0	0	0	0	0	0	0	0	0	0	0	0	0	0	0	0	0	0	0	0	0	0	0	0	Disruptive	0
GSM1607845	M	62.7598	Yes	55	31 to 60	Primary	Hypopharynx	IVA	3	2b	0	multi	Negative	DNA-	882	FALSE	882	FALSE	Atypical IR 1	0	0	0	0	0	0	0	0	0	0	0	0	0	0	0	0	0	0	0	0	0	0	0	0	0	0	0	0	WT	0
GSM1607846	M	59.1704	Yes	25	1 to 30	Primary	Hypopharynx	IVA	4a	0	0	multi	Negative	DNA-	764	FALSE	764	FALSE	Basal 4	0	0	0	0	1	0	0	0	0	0	0	0	0	0	0	0	0	0	0	0	0	0	0	0	0	1	0	0	WT	0
GSM1607847	M	56.5749	Yes	50	>60	Primary	Oropharynx	IVA	2	2a	0	multi	Negative	DNA-	1059	FALSE	700	TRUE	Basal 4	NA	NA	NA	NA	NA	NA	NA	NA	NA	NA	NA	NA	NA	NA	NA	NA	NA	NA	NA	NA	NA	NA	NA	NA	NA	NA	NA	NA	NA	NA
GSM1607848	M	61.8535	Yes	112.5	>60	Primary	Cavum Oris	IVA	4a	0	0	multi	Negative	DNA-	743	FALSE	743	FALSE	Basal 4	0	0	0	0	0	0	0	0	0	0	0	0	0	0	0	0	0	0	0	0	0	0	0	0	0	0	0	0	Disruptive	0
GSM1607849	M	57.076	Yes	41	>60	Primary	Cavum Oris	IVA	3	2c	0	multi	Negative	DNA-	257	TRUE	257	TRUE	Mesenchymal 3	0	0	0	0	0	0	0	0	0	0	0	0	0	0	0	0	0	0	0	0	0	0	0	0	0	0	0	0	WT	0
GSM1607850	M	77.7988	Yes	20	>60	Primary	Larynx	I	1	0	0	mono	Negative	DNA-	617	TRUE	609	TRUE	Mesenchymal 3	0	0	0	0	0	0	0	0	0	0	0	0	0	0	0	0	0	0	0	0	0	0	0	0	0	0	0	0	WT	0
GSM1607851	M	55.7591	Yes	25	>60	Primary	Larynx	IVA	2	2b	0	multi	Negative	DNA-	120	TRUE	120	TRUE	Mesenchymal 3	0	1	0	0	0	0	0	0	0	0	0	0	0	0	0	0	0	0	0	0	0	0	0	0	0	0	0	0	Disruptive	0
GSM1607852	M	57.6783	Yes	50	31 to 60	Primary	Larynx	II	2	0	0	mono	Negative	DNA-	1162	FALSE	1162	FALSE	Basal 4	0	0	0	0	0	0	0	0	0	0	0	0	0	0	0	0	0	0	0	0	0	0	0	0	0	0	0	0	WT	0
GSM1607853	M	69.7988	Yes	38	31 to 60	Primary	Larynx	IVA	4a	0	0	mono	Negative	DNA-	758	FALSE	758	FALSE	Basal 4	0	0	0	0	0	0	0	0	0	0	0	0	0	0	0	0	0	0	0	0	0	0	0	0	0	0	0	0	WT	0
GSM1607854	M	45.3498	No	0	31 to 60	Primary	Cavum Oris	II	2	0	0	mono	Negative	DNA-	765	FALSE	765	FALSE	Mesenchymal 3	0	0	0	0	0	0	0	0	0	0	0	0	0	0	0	0	0	0	0	0	0	0	0	0	0	0	0	0	WT	0
GSM1607855	M	50.1602	Yes	35	1 to 30	Primary	Larynx	IVA	3	2c	0	mono	Negative	DNA-	146	TRUE	146	TRUE	Basal 4	0	0	0	0	0	0	0	0	0	0	0	0	0	0	0	0	0	0	0	0	0	0	0	0	0	0	0	0	Disruptive	0
GSM1607856	M	59.6277	Yes	40	31 to 60	Primary	Hypopharynx	IVB	4a	3	0	multi	Negative	DNA-	209	TRUE	209	TRUE	Mesenchymal 3	0	0	0	0	0	0	0	0	0	0	0	0	0	0	0	0	0	0	0	0	0	0	0	0	0	0	0	0	Non-disruptive	0
GSM1607857	M	74.6968	No	0	>60	Primary	Larynx	IVA	3	2b	0	multi	Negative	DNA-	769	FALSE	769	FALSE	Atypical IR 1	0	0	0	0	0	0	0	0	0	0	0	0	0	0	0	0	0	0	0	0	0	0	0	0	0	0	0	0	WT	0
GSM1607858	M	52.1287	Yes	42	>60	Primary	Larynx	I	1	0	0	mono	HPV16	DNA+RNA-	785	FALSE	785	FALSE	Basal 4	0	0	0	0	0	0	0	0	0	0	0	0	0	0	0	0	0	0	0	0	0	0	0	0	0	0	0	0	WT	0
GSM1607859	M	42.6776	Yes	35	>60	Primary	Hypopharynx	III	2	1	0	multi	Negative	DNA-	843	FALSE	843	FALSE	Classical 2	0	0	0	0	0	0	0	0	0	0	0	0	0	0	0	0	0	0	0	0	0	0	0	0	0	0	0	0	Non-disruptive	0
GSM1607860	M	76.5503	Yes	50	1 to 30	Primary	Larynx	IVA	4a	0	0	multi	Negative	DNA-	826	FALSE	826	FALSE	Basal 4	0	1	0	0	0	0	0	0	0	0	0	0	0	0	0	0	0	0	0	0	0	0	0	0	0	0	0	0	WT	0
GSM1607861	M	57.4593	Yes	45	>60	Primary	Hypopharynx	IVB	2	3	0	multi	Negative	DNA-	258	TRUE	258	TRUE	Mesenchymal 3	0	0	0	0	0	0	0	0	0	0	0	0	0	0	0	0	0	0	0	0	1	0	0	0	0	0	0	0	Disruptive	0
GSM1607862	M	48.2957	Yes	20	1 to 30	Primary	Cavum Oris	IVA	4a	0	0	mono	Negative	DNA-	139	TRUE	115	TRUE	Mesenchymal 3	0	0	0	0	0	0	0	0	0	0	0	0	0	0	0	0	0	0	0	0	0	0	0	0	0	0	0	0	WT	0
GSM1607863	M	46.9268	Yes	15	>60	Primary	Cavum Oris	IVA	4a	2b	0	multi	Negative	DNA-	710	FALSE	710	FALSE	Basal 4	0	0	0	0	0	0	0	0	0	0	0	0	0	0	0	0	0	0	0	0	0	0	0	0	0	0	0	0	Disruptive	0
GSM1607864	M	50.6639	Yes	35	31 to 60	Primary	Hypopharynx	IVA	4a	2b	0	multi	Negative	DNA-	769	FALSE	769	FALSE	Mesenchymal 3	0	0	0	0	0	0	0	0	0	0	0	0	0	0	0	0	0	0	0	0	0	0	0	0	0	0	0	0	WT	0
GSM1607865	F	70.9979	Yes	9	1 to 30	Primary	Cavum Oris	IVC	2	2c	1	multi	Negative	DNA-	305	TRUE	92	TRUE	Mesenchymal 3	0	0	0	0	0	0	0	0	0	0	0	0	0	0	0	0	0	0	0	0	0	0	0	0	0	0	0	0	Disruptive	0
GSM1607866	M	52.052	Yes	35	>60	Primary	Oropharynx	IVA	4a	2c	0	multi	Negative	DNA-	871	FALSE	871	FALSE	Mesenchymal 3	0	0	0	0	0	0	0	0	0	0	0	0	0	0	0	0	0	0	0	0	0	0	0	0	0	0	0	0	Disruptive	0
GSM1607867	M	76.3504	Yes	50	31 to 60	Primary	Cavum Oris	IVA	4a	2c	0	mono	Negative	DNA-	466	TRUE	283	TRUE	Basal 4	0	0	0	0	0	0	0	0	0	0	0	0	0	0	0	0	0	0	0	0	0	0	0	0	0	0	0	0	WT	0
GSM1607868	M	61.1061	Yes	90	31 to 60	Primary	Oropharynx	IVA	1	2c	0	multi	HPV16	DNA+RNA-	855	FALSE	855	FALSE	Atypical IR 1	0	0	0	0	0	0	0	0	0	0	0	0	0	0	0	0	0	0	0	0	0	0	0	0	0	0	0	0	Non-disruptive	0
GSM1607869	M	47.1595	No	0	>60	Primary	Cavum Oris	IVA	4a	1	0	multi	Negative	DNA-	857	FALSE	857	FALSE	Mesenchymal 3	0	0	0	0	0	0	0	0	0	0	0	0	0	0	0	0	0	0	0	0	0	0	0	0	0	0	0	0	WT	0
GSM1607870	M	58.2834	No	0	no	Primary	Cavum Oris	IVA	4a	2c	0	multi	HPV16	DNA+RNA+	840	FALSE	840	FALSE	Atypical IR 1	0	0	0	0	0	0	0	0	0	0	0	0	0	0	0	0	0	0	0	0	0	0	0	0	0	0	0	0	WT	0
GSM1607871	M	53.6537	Yes	60	1 to 30	Primary	Cavum Oris	IVA	4a	2c	0	multi	Negative	DNA-	147	TRUE	147	TRUE	Atypical IR 1	0	0	0	0	0	0	0	0	0	0	0	0	0	0	0	0	0	0	0	0	1	0	0	0	0	0	0	0	WT	0
GSM1607872	M	51.885	Yes	15	1 to 30	Primary	Cavum Oris	IVB	4b	3	0	mono	Negative	DNA-	182	TRUE	124	TRUE	Mesenchymal 3	0	0	0	0	0	0	0	0	0	0	0	0	0	0	0	0	0	0	0	0	0	0	0	0	0	0	0	0	Disruptive	0
GSM1607873	M	48.898	Yes	30	>60	Primary	Cavum Oris	IVA	3	2c	0	multi	Negative	DNA-	825	FALSE	825	FALSE	Basal 4	0	0	0	0	0	0	0	0	0	0	0	0	0	0	0	0	0	0	0	0	0	0	0	0	0	0	0	1	WT	0
GSM1607874	M	56.3614	Yes	20	>60	Primary	Oropharynx	II	2	0	0	mono	Negative	DNA-	790	FALSE	601	TRUE	Basal 4	0	0	0	0	0	0	0	0	0	0	0	0	0	0	0	0	0	0	0	0	0	0	0	0	0	0	0	0	Disruptive	0
GSM1607875	F	53.911	Yes	10	1 to 30	Primary	Oropharynx	II	2	0	0	mono	Negative	DNA-	877	FALSE	539	TRUE	Mesenchymal 3	0	0	0	0	0	0	0	0	0	0	0	0	0	0	0	0	0	0	0	0	0	0	0	0	0	0	0	0	WT	0
GSM1607876	M	75.7098	Yes	120	31 to 60	Primary	Oropharynx	IVA	2	2b	0	multi	HPV16	DNA+RNA+	813	FALSE	568	TRUE	Atypical IR 1	0	0	0	0	0	0	0	0	0	0	0	0	0	0	0	0	0	0	0	0	0	0	0	0	0	0	0	0	WT	0
GSM1607877	M	58.6804	Yes	60	>60	Primary	Oropharynx	IVA	3	2c	0	multi	HPV16	DNA+RNA+	268	TRUE	239	TRUE	Atypical IR 1	0	0	0	0	0	0	0	0	0	0	0	0	0	0	0	0	0	0	0	0	0	0	0	0	0	0	0	0	WT	0
GSM1607878	M	48.8159	Yes	24	31 to 60	Primary	Oropharynx	IVA	2	2b	0	multi	HPV16	DNA+RNA+	785	FALSE	785	FALSE	Atypical IR 1	0	0	0	0	0	0	0	0	0	0	0	0	0	0	0	0	0	0	0	0	0	0	0	0	0	0	0	0	WT	0
GSM1607879	M	56.3395	Yes	13	1 to 30	Primary	Oropharynx	IVA	2	2c	0	mono	Other HPV	NA	777	FALSE	777	FALSE	Atypical IR 1	0	0	0	0	0	0	0	0	0	0	0	0	0	0	0	0	0	0	0	0	0	0	0	0	0	0	0	0	WT	0
GSM1607880	M	62.141	No	0	1 to 30	Primary	Oropharynx	IVA	3	2b	0	multi	HPV16	DNA+RNA+	778	FALSE	778	FALSE	Atypical IR 1	0	0	0	0	0	0	0	0	0	0	0	0	0	0	0	0	0	0	0	0	0	0	0	0	0	0	0	0	WT	0
GSM1607881	F	75.384	No	0	1 to 30	Primary	Cavum Oris	I	1	0	0	mono	HPV16	DNA+RNA-	787	FALSE	787	FALSE	Mesenchymal 3	0	0	0	0	0	0	0	0	0	0	0	0	0	0	0	0	0	0	0	0	0	0	0	0	0	0	0	0	WT	0
GSM1607882	M	48.2984	Yes	20	no	Primary	Oropharynx	II	2	0	0	mono	Negative	DNA-	750	FALSE	750	FALSE	Basal 4	0	0	0	0	0	0	0	0	0	0	0	0	0	0	0	0	0	0	0	0	0	0	0	0	0	0	0	0	WT	0
GSM1607883	M	66.0507	Yes	35	1 to 30	Primary	Oropharynx	IVA	4a	2a	0	multi	Negative	DNA-	324	TRUE	324	TRUE	Mesenchymal 3	0	0	0	0	0	0	0	0	0	0	0	0	0	0	0	0	0	0	0	0	0	0	0	0	0	0	0	0	WT	0
GSM1607884	M	44.3039	Yes	15	31 to 60	Primary	Oropharynx	IVA	4a	2c	0	multi	Negative	DNA-	1115	FALSE	653	TRUE	Classical 2	0	0	0	0	0	0	0	0	0	0	0	0	0	0	0	0	0	0	0	0	0	0	0	0	0	0	0	0	WT	0
GSM1607885	M	52.4298	Yes	40	31 to 60	Primary	Cavum Oris	IVA	3	2b	0	multi	Negative	DNA-	279	TRUE	279	TRUE	Basal 4	0	0	0	0	0	0	0	0	0	0	0	0	0	0	0	0	0	0	0	0	0	1	0	0	0	1	0	0	Disruptive	0
GSM1607886	M	48.3614	Yes	35	>60	Primary	Oropharynx	IVA	4a	2b	0	multi	Negative	DNA-	741	FALSE	405	TRUE	Basal 4	0	0	0	0	0	0	0	0	0	0	0	0	0	0	0	0	0	0	0	0	0	0	0	0	0	0	0	0	WT	0
GSM1607887	M	70.4011	Yes	15	1 to 30	Primary	Cavum Oris	IVA	2	2b	0	multi	HPV16	DNA+RNA+	764	FALSE	764	FALSE	Atypical IR 1	0	0	0	0	0	0	0	0	0	0	0	0	0	0	0	0	0	0	0	0	0	0	0	0	0	0	0	0	WT	0
GSM1607888	M	57.8371	Yes	45	>60	Primary	Cavum Oris	III	2	1	0	multi	Negative	DNA-	769	FALSE	769	FALSE	Classical 2	0	0	1	0	0	0	0	0	0	0	0	0	0	0	0	0	0	0	0	0	0	0	0	0	0	0	0	0	WT	0
GSM1607889	F	35.3402	Yes	4	1 to 30	Primary	Cavum Oris	I	1	0	0	mono	Negative	DNA-	751	FALSE	751	FALSE	Basal 4	0	0	0	0	0	0	0	0	0	0	0	0	0	0	0	0	0	0	0	0	0	0	0	0	0	0	0	0	WT	0
GSM1607890	F	82.089	No	0	no	Primary	Cavum Oris	IVA	4a	2c	0	mono	Negative	DNA-	212	TRUE	158	TRUE	Basal 4	0	0	0	0	0	0	0	0	0	0	0	0	0	0	0	0	0	0	0	0	0	0	0	0	0	0	0	0	Disruptive	0
GSM1607891	M	68.1506	Yes	40	>60	Primary	Oropharynx	IVB	3	3	0	mono	Negative	DNA-	325	TRUE	325	TRUE	Atypical IR 1	0	0	0	0	0	0	0	0	0	0	0	0	0	0	0	0	0	0	0	0	0	0	0	0	0	0	0	0	WT	0
GSM1607892	F	59.0418	Yes	22.5	31 to 60	Primary	Cavum Oris	IVA	4a	2c	0	multi	Negative	DNA-	616	TRUE	616	TRUE	Mesenchymal 3	0	0	0	0	1	0	0	0	0	0	0	0	0	0	0	0	0	0	0	0	0	0	0	0	0	0	0	0	WT	0
GSM1607893	M	61.1417	Yes	30	>60	Primary	Oropharynx	IVA	2	2b	0	mono	HPV16	DNA+RNA+	776	FALSE	776	FALSE	Atypical IR 1	0	0	0	0	0	0	0	0	0	0	0	0	0	0	0	0	0	0	0	0	0	0	0	0	0	0	0	0	WT	0
GSM1607894	M	70.0862	Yes	50	no	Primary	Cavum Oris	IVA	4a	2c	0	multi	Negative	DNA-	825	FALSE	825	FALSE	Mesenchymal 3	0	0	0	0	0	0	0	0	0	0	0	0	0	0	0	0	0	0	0	0	0	1	0	0	0	0	0	0	Non-disruptive	0
GSM1607895	M	58.6639	Yes	75	1 to 30	Primary	Oropharynx	IVA	2	2c	0	multi	Negative	DNA-	1357	FALSE	1357	FALSE	Mesenchymal 3	0	0	0	0	0	0	0	0	0	0	0	0	0	0	0	0	0	0	0	0	0	0	0	0	0	0	0	0	Non-disruptive	0
GSM1607896	F	46.5106	Yes	68	>60	Primary	Cavum Oris	IVA	3	2c	0	multi	Negative	DNA-	1063	TRUE	1035	TRUE	Mesenchymal 3	0	0	0	0	0	0	0	0	0	0	0	0	0	0	1	0	0	0	0	0	0	0	0	0	0	0	0	0	Disruptive	0
GSM1607897	M	59.4004	Yes	55	>60	Primary	Cavum Oris	IVA	4a	2b	0	mono	Negative	DNA-	294	TRUE	157	TRUE	Basal 4	1	0	1	0	0	0	0	0	0	0	0	0	0	0	0	0	1	0	0	0	0	0	0	0	0	0	0	0	Disruptive	0
GSM1607898	M	53.2731	Yes	30	31 to 60	Primary	Cavum Oris	I	1	0	0	mono	Negative	DNA-	680	FALSE	680	FALSE	Basal 4	0	0	0	0	0	0	0	0	0	0	0	0	0	0	0	0	0	0	0	0	0	0	0	0	0	0	0	0	Non-disruptive	0
GSM1607899	M	74.9432	Yes	40	no	Primary	Oropharynx	IVB	4b	2c	0	mono	HPV16	DNA+RNA+	689	FALSE	142	TRUE	Basal 4	0	0	0	0	0	0	0	0	0	0	0	0	0	0	0	0	0	0	0	0	0	0	0	0	0	0	0	0	WT	0
GSM1607900	F	59.8932	Yes	10.3	1 to 30	Primary	Oropharynx	III	2	1	0	multi	HPV16	DNA+RNA+	657	FALSE	657	FALSE	Mesenchymal 3	0	0	0	0	0	0	0	0	0	0	0	0	0	0	0	0	0	0	0	0	0	0	0	0	0	0	0	0	WT	0
GSM1607901	M	60.5476	Yes	45	>60	Primary	Oropharynx	IVA	4a	2b	0	mono	Negative	DNA-	366	TRUE	366	TRUE	Mesenchymal 3	0	0	0	0	0	0	0	0	0	0	0	0	0	0	0	0	0	0	0	0	0	0	0	0	0	0	0	0	Non-disruptive	0
GSM1607902	M	69.8617	Yes	60	31 to 60	Primary	Oropharynx	IVB	4a	3	0	multi	HPV16	DNA+RNA+	611	TRUE	611	TRUE	Atypical IR 1	0	0	0	0	1	0	0	0	0	0	0	0	0	0	0	0	0	0	0	0	0	0	0	0	1	0	0	0	WT	0
GSM1607903	M	61.3498	Yes	40	31 to 60	Primary	Oropharynx	II	2	0	0	multi	HPV16	DNA+RNA-	665	FALSE	665	FALSE	Mesenchymal 3	0	0	0	0	0	0	0	0	0	0	0	0	0	0	0	0	0	0	0	0	0	0	0	0	0	0	0	0	Non-disruptive	0
GSM1607904	M	68.9363	Yes	50	31 to 60	Primary	Oropharynx	IVA	1	2b	0	mono	HPV16	DNA+RNA-	701	FALSE	330	TRUE	Basal 4	0	0	0	0	0	0	0	0	0	0	0	0	0	0	0	0	0	0	0	0	0	0	0	0	0	0	0	0	WT	0
GSM1607905	M	58.3381	Yes	15	no	Primary	Oropharynx	IVA	4a	2b	0	mono	HPV16	DNA+RNA+	657	FALSE	657	FALSE	Atypical IR 1	0	0	0	0	0	0	0	0	0	0	0	0	0	0	0	0	0	0	0	0	0	0	0	0	0	0	0	0	WT	0
GSM1607906	F	70.1136	Yes	50	no	Primary	Cavum Oris	IVA	4a	0	0	multi	Negative	DNA-	632	FALSE	632	FALSE	Mesenchymal 3	0	0	0	0	0	0	0	0	0	0	0	0	0	0	0	0	0	0	0	0	0	0	0	0	0	0	0	0	WT	0
GSM1607907	M	78.809	Yes	38	>60	Primary	Oropharynx	IVA	1	2c	0	mono	Negative	DNA-	161	TRUE	161	TRUE	Mesenchymal 3	NA	NA	NA	NA	NA	NA	NA	NA	NA	NA	NA	NA	NA	NA	NA	NA	NA	NA	NA	NA	NA	NA	NA	NA	NA	NA	NA	NA	NA	NA
GSM1607908	M	58.705	Yes	40	>60	Primary	Oropharynx	IVC	3	3	1	multi	Negative	DNA-	415	TRUE	189	TRUE	Basal 4	NA	NA	NA	NA	NA	NA	NA	NA	NA	NA	NA	NA	NA	NA	NA	NA	NA	NA	NA	NA	NA	NA	NA	NA	NA	NA	NA	NA	NA	NA
GSM1607909	M	76.0767	Yes	25	31 to 60	Primary	Cavum Oris	IVA	4a	1	0	mono	Negative	DNA-	619	FALSE	619	FALSE	Mesenchymal 3	NA	NA	NA	NA	NA	NA	NA	NA	NA	NA	NA	NA	NA	NA	NA	NA	NA	NA	NA	NA	NA	NA	NA	NA	NA	NA	NA	NA	NA	NA
GSM1607910	M	54.3162	No	0	31 to 60	Primary	Oropharynx	IVA	2	2b	0	multi	HPV16	DNA+RNA+	605	FALSE	605	FALSE	Atypical IR 1	NA	NA	NA	NA	NA	NA	NA	NA	NA	NA	NA	NA	NA	NA	NA	NA	NA	NA	NA	NA	NA	NA	NA	NA	NA	NA	NA	NA	NA	NA
GSM1607911	F	85.7194	No	0	1 to 30	Primary	Cavum Oris	IVA	4a	2c	0	palliative	Negative	DNA-	652	FALSE	652	FALSE	Classical 2	0	0	0	0	0	0	0	0	0	0	0	0	0	0	0	0	0	0	0	0	0	0	0	0	0	0	0	0	Non-disruptive	0
GSM1607912	M	60.1177	Yes	60	>60	Primary	Larynx	II	2	0	0	multi	Negative	DNA-	643	FALSE	643	FALSE	Classical 2	0	0	0	0	0	0	0	0	0	0	0	0	0	0	0	0	0	0	0	0	1	0	0	0	0	0	0	0	WT	0
GSM1607913	M	49.2129	Yes	45	1 to 30	Primary	Hypopharynx	IVA	4a	2c	0	multi	HPV16	DNA+RNA-	603	FALSE	603	FALSE	Mesenchymal 3	0	0	0	0	0	0	0	0	0	0	0	0	0	0	0	0	0	0	0	0	0	0	0	0	0	0	0	0	WT	0
GSM1607914	F	69.9959	No	0	>60	Primary	Hypopharynx	IVA	4a	0	0	multi	Other HPV	NA	1210	TRUE	159	TRUE	Mesenchymal 3	0	0	0	0	1	0	0	0	0	0	0	0	0	0	0	0	0	0	0	0	0	0	0	0	0	0	0	0	WT	0
GSM1607915	M	85.6454	Yes	25	no	Relapse	Hypopharynx	II	2	0	0	multi	Negative	DNA-	510	TRUE	510	TRUE	Atypical IR 1	0	0	0	0	0	0	0	0	0	0	0	0	0	0	0	0	0	0	0	0	0	0	0	0	0	0	0	0	Non-disruptive	0
GSM1607916	M	55.3265	Yes	30	31 to 60	Secondary	Hypopharynx	I	1	0	0	multi	Negative	DNA-	662	TRUE	662	TRUE	Basal 4	0	0	0	0	0	0	0	0	0	0	0	0	0	0	0	0	0	0	0	0	0	0	0	0	0	0	0	0	WT	0
GSM1607917	M	69.8973	Yes	40	>60	Secondary	Hypopharynx	III	3	0	0	multi	Negative	DNA-	188	TRUE	188	TRUE	Classical 2	NA	NA	NA	NA	NA	NA	NA	NA	NA	NA	NA	NA	NA	NA	NA	NA	NA	NA	NA	NA	NA	NA	NA	NA	NA	NA	NA	NA	NA	NA
GSM1607918	M	70.0507	Yes	30	1 to 30	Secondary	Cavum Oris	IVA	4a	0	0	mono	Negative	DNA-	46	TRUE	46	TRUE	Atypical IR 1	0	1	0	0	0	0	0	0	0	0	0	0	0	0	0	0	0	0	0	0	0	0	0	0	0	0	0	0	Non-disruptive	0
GSM1607919	M	66.8884	Yes	60	31 to 60	Secondary	Larynx	IVA	4a	0	0	multi	Negative	DNA-	783	FALSE	364	TRUE	Classical 2	0	1	0	0	0	0	0	0	0	0	0	0	0	0	0	0	0	0	0	0	0	0	0	0	0	0	0	0	Disruptive	0
GSM1607920	M	74.3573	Yes	55	31 to 60	Secondary	Cavum Oris	IVA	4a	0	0	multi	Negative	DNA-	1067	FALSE	1067	FALSE	Mesenchymal 3	0	0	0	0	1	0	0	0	0	0	0	0	0	0	0	0	0	0	0	0	0	0	0	0	0	0	0	0	WT	0
GSM1607921	M	62.6721	Yes	50	>60	Secondary	Larynx	IVC	3	0	1	mono	Negative	DNA-	344	TRUE	289	TRUE	Basal 4	NA	NA	NA	NA	NA	NA	NA	NA	NA	NA	NA	NA	NA	NA	NA	NA	NA	NA	NA	NA	NA	NA	NA	NA	NA	NA	NA	NA	NA	NA
GSM1607922	F	62.5654	Yes	10	no	Secondary	Larynx	III	3	0	0	multi	Negative	DNA-	833	FALSE	760	TRUE	Basal 4	0	0	0	0	0	0	0	0	0	0	0	0	0	0	0	0	0	0	0	0	0	0	0	0	0	0	0	0	WT	0
GSM1607923	M	57.8426	Yes	160	>60	Secondary	Cavum Oris	IVA	4a	0	0	multi	Negative	DNA-	805	FALSE	603	TRUE	Basal 4	NA	NA	NA	NA	NA	NA	NA	NA	NA	NA	NA	NA	NA	NA	NA	NA	NA	NA	NA	NA	NA	NA	NA	NA	NA	NA	NA	NA	NA	NA
GSM1607924	F	87.0445	No	0	1 to 30	Relapse	Cavum Oris	III	3	0	0	multi	Negative	DNA-	154	TRUE	154	TRUE	Basal 4	NA	NA	NA	NA	NA	NA	NA	NA	NA	NA	NA	NA	NA	NA	NA	NA	NA	NA	NA	NA	NA	NA	NA	NA	NA	NA	NA	NA	NA	NA
GSM1607925	M	67.6057	Yes	34	1 to 30	Secondary	Larynx	II	2	0	0	mono	Negative	DNA-	734	FALSE	725	TRUE	Classical 2	NA	NA	NA	NA	NA	NA	NA	NA	NA	NA	NA	NA	NA	NA	NA	NA	NA	NA	NA	NA	NA	NA	NA	NA	NA	NA	NA	NA	NA	NA
GSM1607926	F	50.7269	Yes	30	31 to 60	Relapse	Hypopharynx	IVA	4a	0	0	multi	Negative	DNA-	198	TRUE	193	TRUE	Mesenchymal 3	NA	NA	NA	NA	NA	NA	NA	NA	NA	NA	NA	NA	NA	NA	NA	NA	NA	NA	NA	NA	NA	NA	NA	NA	NA	NA	NA	NA	NA	NA
GSM1607927	M	52.6242	Yes	18	no	Primary	NA	IVA	3	2a	0	mono	Negative	DNA-	578	TRUE	578	TRUE	Atypical IR 1	0	0	0	0	0	0	0	0	0	0	0	0	0	0	0	0	0	0	1	0	0	0	0	0	0	0	0	0	WT	0
GSM1607928	M	49.9877	Yes	30	>60	Primary	Oropharynx	IVA	4a	2b	0	multi	Negative	DNA-	346	TRUE	346	TRUE	Basal 4	NA	NA	NA	NA	NA	NA	NA	NA	NA	NA	NA	NA	NA	NA	NA	NA	NA	NA	NA	NA	NA	NA	NA	NA	NA	NA	NA	NA	NA	NA
GSM1607929	M	38.1437	Yes	17	1 to 30	Primary	Cavum Oris	IVA	2	2b	0	multi	Negative	DNA-	596	FALSE	404	TRUE	Atypical IR 1	NA	NA	NA	NA	NA	NA	NA	NA	NA	NA	NA	NA	NA	NA	NA	NA	NA	NA	NA	NA	NA	NA	NA	NA	NA	NA	NA	NA	NA	NA
GSM1607930	M	50.4641	Yes	15	>60	Primary	Oropharynx	IVA	4a	0	0	multi	Negative	DNA-	590	FALSE	590	FALSE	Basal 4	NA	NA	NA	NA	NA	NA	NA	NA	NA	NA	NA	NA	NA	NA	NA	NA	NA	NA	NA	NA	NA	NA	NA	NA	NA	NA	NA	NA	NA	NA
GSM1607931	M	41.6893	Yes	20.3	31 to 60	Primary	Cavum Oris	IVA	4a	2c	0	multi	HPV16	DNA+RNA-	596	FALSE	596	FALSE	Mesenchymal 3	NA	NA	NA	NA	NA	NA	NA	NA	NA	NA	NA	NA	NA	NA	NA	NA	NA	NA	NA	NA	NA	NA	NA	NA	NA	NA	NA	NA	NA	NA
GSM1607932	M	71.2389	Yes	40	1 to 30	Primary	Oropharynx	IVA	2	2b	0	multi	Negative	DNA-	358	TRUE	311	TRUE	Mesenchymal 3	NA	NA	NA	NA	NA	NA	NA	NA	NA	NA	NA	NA	NA	NA	NA	NA	NA	NA	NA	NA	NA	NA	NA	NA	NA	NA	NA	NA	NA	NA
GSM1607933	M	52.2847	Yes	30	1 to 30	Primary	Oropharynx	II	2	0	0	mono	HPV16	DNA+RNA+	590	FALSE	590	FALSE	Basal 4	0	0	0	0	0	0	0	0	0	0	0	0	0	0	0	0	0	0	0	0	0	0	0	0	0	0	0	0	WT	0
GSM1607934	M	53.7577	Yes	30	31 to 60	Primary	Cavum Oris	I	1	0	0	palliative	Negative	DNA-	582	FALSE	582	FALSE	Mesenchymal 3	NA	NA	NA	NA	NA	NA	NA	NA	NA	NA	NA	NA	NA	NA	NA	NA	NA	NA	NA	NA	NA	NA	NA	NA	NA	NA	NA	NA	NA	NA
GSM1607935	M	59.1485	No	0	1 to 30	Primary	Oropharynx	III	3	1	0	mono	Negative	DNA-	581	FALSE	581	FALSE	Atypical IR 1	0	0	0	0	0	0	0	0	0	0	0	0	0	0	0	0	0	0	0	0	0	0	0	0	0	0	0	0	WT	0
GSM1607936	F	73.3854	Yes	7.5	1 to 30	Primary	Oropharynx	IVA	1	2c	0	multi	Negative	DNA-	553	FALSE	553	FALSE	Basal 4	NA	NA	NA	NA	NA	NA	NA	NA	NA	NA	NA	NA	NA	NA	NA	NA	NA	NA	NA	NA	NA	NA	NA	NA	NA	NA	NA	NA	NA	NA
GSM1607937	M	51.6112	Yes	35	>60	Primary	Cavum Oris	IVA	1	2c	0	multi	Negative	DNA-	574	FALSE	574	FALSE	Classical 2	0	0	0	0	0	0	0	0	0	0	0	0	0	0	0	0	0	0	0	0	0	0	0	0	0	0	0	0	WT	0
GSM1607938	M	56.2519	Yes	40	>60	Primary	Hypopharynx	III	2	1	0	mono	Negative	DNA-	605	FALSE	132	TRUE	Classical 2	0	0	0	1	0	0	0	0	0	0	0	0	0	0	0	0	0	0	0	0	0	0	1	0	0	0	0	0	Disruptive	0
GSM1607939	F	55.447	Yes	7.5	1 to 30	Primary	Oropharynx	IVA	4a	0	0	multi	Other HPV	NA	603	FALSE	603	FALSE	Mesenchymal 3	NA	NA	NA	NA	NA	NA	NA	NA	NA	NA	NA	NA	NA	NA	NA	NA	NA	NA	NA	NA	NA	NA	NA	NA	NA	NA	NA	NA	NA	NA
GSM1607940	M	53.6975	Yes	60	1 to 30	Primary	Larynx	II	2	0	0	mono	Negative	DNA-	582	FALSE	582	FALSE	Classical 2	NA	NA	NA	NA	NA	NA	NA	NA	NA	NA	NA	NA	NA	NA	NA	NA	NA	NA	NA	NA	NA	NA	NA	NA	NA	NA	NA	NA	NA	NA
GSM1607941	M	45.9822	No	0	1 to 30	Primary	Hypopharynx	IVA	2	2a	0	multi	HPV16	DNA+RNA+	577	FALSE	577	FALSE	Atypical IR 1	0	0	0	0	0	0	0	0	0	0	0	0	0	0	0	0	0	0	0	0	0	0	0	0	0	0	0	0	WT	0
GSM1607942	M	72.9391	Yes	1	1 to 30	Primary	Oropharynx	IVA	3	2b	0	multi	HPV16	DNA+RNA-	20	TRUE	20	TRUE	Mesenchymal 3	0	0	0	0	0	0	0	0	0	0	0	0	0	0	0	0	0	0	0	0	0	0	0	0	0	0	0	0	Disruptive	0
GSM1607943	M	47.9507	Yes	13.5	>60	Primary	Hypopharynx	IVA	4a	2b	0	multi	Negative	DNA-	566	FALSE	566	FALSE	Classical 2	0	0	0	0	0	0	0	0	0	0	0	0	0	0	0	0	0	0	0	0	0	0	0	0	0	0	0	0	WT	0
GSM1607944	M	43.2799	Yes	40	1 to 30	Primary	Cavum Oris	III	1	1	0	mono	Negative	DNA-	596	FALSE	271	TRUE	Atypical IR 1	0	0	0	0	0	0	0	0	0	0	0	0	0	0	0	0	0	0	0	0	0	0	0	0	0	0	0	0	Disruptive	0
GSM1607945	M	58.0315	Yes	35	>60	Primary	Cavum Oris	IVA	4a	2a	0	mono	Negative	DNA-	672	FALSE	249	TRUE	Mesenchymal 3	0	0	0	0	0	0	0	0	0	0	0	0	0	0	0	0	0	0	0	0	0	0	0	0	0	0	0	0	Non-disruptive	0
GSM1607946	F	64.0767	Yes	7.5	1 to 30	Primary	Larynx	IVA	4a	2c	0	mono	Negative	DNA-	552	FALSE	552	FALSE	Basal 4	0	0	0	0	0	0	0	0	0	0	0	0	0	0	0	0	0	0	0	0	0	0	0	0	0	0	0	0	Non-disruptive	0
GSM1607947	M	44.7173	No	0	no	Primary	NA	IVB	4b	2c	0	multi	Negative	DNA-	549	FALSE	549	FALSE	Atypical IR 1	0	1	0	0	0	0	0	0	0	0	0	0	0	0	0	0	0	0	0	0	0	0	0	0	0	0	0	0	WT	0
GSM1607948	F	44.8871	No	0	no	Secondary	NA	IVB	4b	0	0	multi	Negative	DNA-	546	FALSE	476	TRUE	Atypical IR 1	NA	NA	NA	NA	NA	NA	NA	NA	NA	NA	NA	NA	NA	NA	NA	NA	NA	NA	NA	NA	NA	NA	NA	NA	NA	NA	NA	NA	NA	NA
GSM1607949	M	51.4251	Yes	61	31 to 60	Primary	Cavum Oris	II	2	0	0	mono	Negative	DNA-	563	FALSE	563	FALSE	Basal 4	0	0	0	0	0	0	0	0	0	0	0	0	0	0	0	0	0	0	0	0	0	0	0	0	0	0	0	0	Disruptive	0
GSM1607950	M	51.7974	Yes	45	31 to 60	Primary	Larynx	II	2	0	0	mono	Negative	DNA-	623	FALSE	623	FALSE	Basal 4	0	0	0	0	0	0	0	0	0	0	0	0	0	0	0	0	0	0	0	0	1	0	0	0	0	0	0	0	WT	0
GSM1607951	M	74.4969	Yes	44	31 to 60	Primary	Larynx	IVA	3	2b	0	multi	Negative	DNA-	597	FALSE	597	FALSE	Atypical IR 1	0	0	0	0	0	0	0	0	0	0	0	0	0	0	0	0	0	0	0	0	0	0	0	0	0	0	0	0	WT	0
GSM1607952	M	59.3593	Yes	40	>60	Secondary	Oropharynx	I	1	0	0	multi	Negative	DNA-	11	TRUE	11	TRUE	Atypical IR 1	NA	NA	NA	NA	NA	NA	NA	NA	NA	NA	NA	NA	NA	NA	NA	NA	NA	NA	NA	NA	NA	NA	NA	NA	NA	NA	NA	NA	NA	NA
GSM1607953	M	61.399	No	0	1 to 30	Secondary	Cavum Oris	II	2	0	0	multi	Negative	DNA-	577	FALSE	162	TRUE	Basal 4	0	0	0	0	0	0	0	0	0	0	0	0	0	0	0	0	0	0	0	0	0	0	0	0	0	0	0	0	Disruptive	0
